# Supplementary material for: Staphylococcus saprophyticus Proteomic Analyses Elucidate Differences in the Protein Repertories among Clinical Strains Related to Virulence and Persistence
Source: MDPI journal article supplement (doi:10.3390/pathogens9010069), 2020-01-19
Supplement: s1 [file s1]

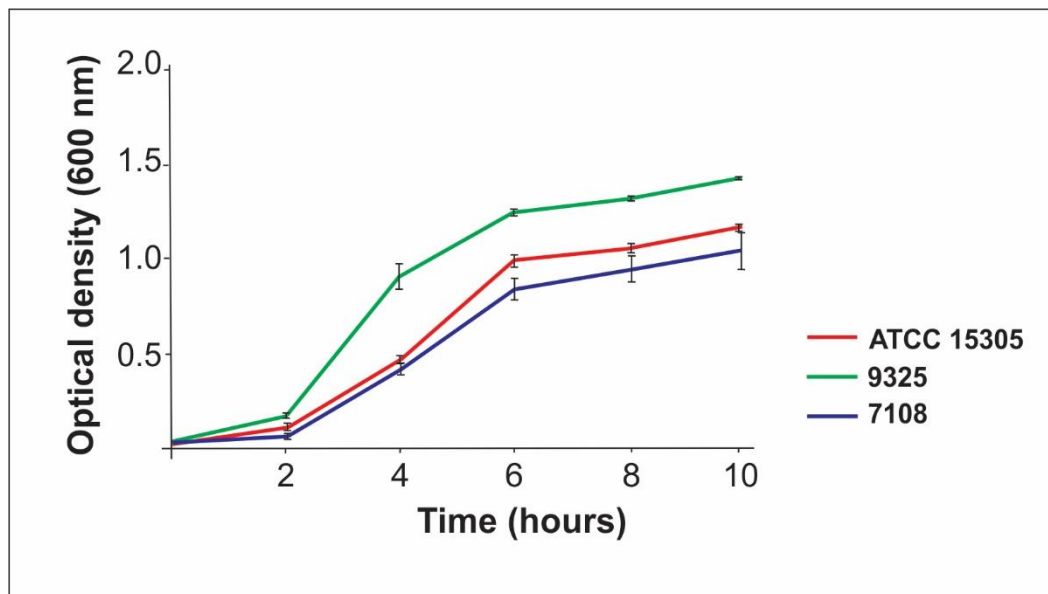

**Supplementary Figure 1 – *S. saprophyticus* cell growth curve.** The graphic demonstrates *S. saprophyticus* strains growth behavior in 10h period.
