# Supplementary material for: Staphylococcus saprophyticus Proteomic Analyses Elucidate Differences in the Protein Repertories among Clinical Strains Related to Virulence and Persistence
Source: MDPI journal article supplement (doi:10.3390/pathogens9010069), 2020-01-19
Supplement: s1 [file s1]

**Supplementary Table 1 - List of proteins identified in this work.**

| Accession<br>number1  | Protein description                                            | Log FC <sup>2</sup> |                 |                 | <i>p</i> -value <sup>3</sup> |                 |                 |
|-----------------------|----------------------------------------------------------------|---------------------|-----------------|-----------------|------------------------------|-----------------|-----------------|
|                       |                                                                | ATCC vs<br>7108     | ATCC vs<br>9325 | 7108 vs<br>9325 | ATCC vs<br>7108              | ATCC vs<br>9325 | 7108 vs<br>9325 |
| Transcription         |                                                                |                     |                 |                 |                              |                 |                 |
| Q49UV9                | Cold shock protein                                             | -0.416              | -0.224          | 0.192           | 0.794                        | 0.849           | 0.912           |
| Q49XK3                | Cold shock protein CspA                                        | -0.160              | 0.711           | 0.871           | 0.892                        | 0.230           | 0.150           |
| Q49V46                | Transcription termination/antitermination protein NusG         | 0.227               | -0.016          | -0.243          | 0.616                        | 0.966           | 0.560           |
| Q49V52                | DNA-directed RNA polymerase subunit beta                       | -0.050              | 0.497           | 0.547           | 0.993                        | 0.756           | 0.775           |
| Q49V53                | DNA-directed RNA polymerase subunit beta                       | -0.096              | -0.122          | -0.025          | 0.963                        | 0.939           | 1.000           |
| Q49VL1                | Probable transcriptional regulatory protein SSP2054            | 0.350               | 0.493           | 0.143           | 0.378                        | 0.110           | 0.735           |
| Q49VN3                | Putative transcriptional regulator                             | -0.062              | 0.146           | 0.209           | 0.796                        | 0.403           | 0.239           |
| Q49WZ2                | DNA-directed RNA polymerase subunit omega                      | -0.088              | -0.088          | 0.000           | 0.689                        | 0.609           | 1.000           |
| Q49X40                | GTP-sensing transcriptional pleiotropic repressor CodY         | 0.523               | 0.631           | 0.108           | 0.378                        | 0.172           | 0.894           |
| Q49X51                | Transcription termination/antitermination protein NusA         | 0.240               | -0.428          | -0.668          | 0.796                        | 0.534           | 0.335           |
| Q49X65                | Putative transcriptional regulator                             | 0.361               | 0.098           | -0.263          | 0.195                        | 0.709           | 0.291           |
| Q49Y04                | RNA polymerase sigma factor SigA                               | -0.261              | 0.159           | 0.419           | 0.453                        | 0.573           | 0.116           |
| Q49Y48                | Transcription elongation factor GreA                           | 0.789               | 1.026           | 0.237           | 0.224                        | 0.061           | 0.747           |
| Q49Y64                | Putative transcriptional regulator                             | -0.203              | -0.225          | -0.021          | 0.464                        | 0.326           | 0.973           |
| Q49ZE2                | DNA-directed RNA polymerase subunit alpha                      | -0.047              | -0.358          | -0.311          | 0.954                        | 0.364           | 0.467           |
| Q49YJ2                | HTH-type transcriptional regulator rot                         | 0.280               | -0.397          | -0.677          | 0.706                        | 0.500           | 0.239           |
| Amino acid metabolism |                                                                |                     |                 |                 |                              |                 |                 |
| Q49V22                | Cysteine synthase                                              | -0.851              | -0.593          | 0.258           | 0.000                        | 0.007           | 0.248           |
| Q49W45                | Glycine cleavage system H protein                              | 0.337               | 0.699           | 0.362           | 0.342                        | 0.019           | 0.226           |
| Q49XA2                | Glutamine synthetase                                           | -0.416              | -0.885          | -0.469          | 0.163                        | 0.001           | 0.061           |
| Q49YD9                | Alanine dehydrogenase                                          | 0.879               | 2.013           | 1.134           | 0.183                        | 0.001           | 0.042           |
| Q49ZA2                | Glutamine--fructose-6-phosphate aminotransferase [isomerizing] | -0.134              | -2.288          | -2.155          | 0.929                        | 0.004           | 0.005           |
| Q4A0E7                | 1-pyrroline-5-carboxylate dehydrogenase                        | 1.054               | 1.308           | 0.254           | 0.082                        | 0.017           | 0.724           |

|                          |                                                 |        |        |        |       |       |       |
|--------------------------|-------------------------------------------------|--------|--------|--------|-------|-------|-------|
| Q49VA2                   | Branched-chain-amino-acid aminotransferase      | -0.098 | 0.207  | 0.305  | 0.940 | 0.777 | 0.735 |
| Q49VS0                   | Histidinol-phosphate aminotransferase           | -0.196 | 0.098  | 0.294  | 0.644 | 0.778 | 0.405 |
| Q49W97                   | Glutamate dehydrogenase                         | 0.301  | -0.041 | -0.342 | 0.631 | 0.948 | 0.552 |
| Q49YG8                   | DAHP synthetase-chorismate mutase               | -1.122 | -0.164 | 0.958  | 0.183 | 0.834 | 0.191 |
| Q49YI1                   | D-alanine aminotransferase                      | 0.524  | 0.752  | 0.228  | 0.464 | 0.172 | 0.762 |
| Q49YI2                   | Putative dipeptidase SSP1012                    | -0.067 | 0.531  | 0.598  | 0.954 | 0.385 | 0.339 |
| Q4A0D4                   | 3-hydroxy-3-methylglutaryl coenzyme A reductase | 0.119  | 0.732  | 0.613  | 0.901 | 0.147 | 0.253 |
| Q4A0D6                   | 3-hydroxy-3-methylglutaryl CoA synthase         | 0.063  | -0.731 | -0.794 | 0.938 | 0.067 | 0.050 |
| <b>Protein synthesis</b> |                                                 |        |        |        |       |       |       |
| Q49UP8                   | Ribosome-binding ATPase YchF                    | 1.159  | 1.167  | 0.008  | 0.070 | 0.038 | 1.000 |
| Q49UZ9                   | Methionine--tRNA ligase                         | -0.214 | 1.851  | 2.065  | 0.901 | 0.044 | 0.024 |
| Q49V37                   | Glutamate--tRNA ligase                          | 0.418  | 1.593  | 1.175  | 0.602 | 0.013 | 0.058 |
| Q49V49                   | 50S ribosomal protein L10                       | -0.030 | -0.586 | -0.557 | 0.954 | 0.022 | 0.024 |
| Q49V55                   | 30S ribosomal protein S12                       | 0.543  | -0.411 | -0.954 | 0.068 | 0.105 | 0.001 |
| Q49V56                   | 30S ribosomal protein S7                        | 0.331  | -0.543 | -0.873 | 0.274 | 0.038 | 0.001 |
| Q49X24                   | 30S ribosomal protein S16                       | -0.050 | -0.707 | -0.656 | 0.933 | 0.022 | 0.027 |
| Q49X41                   | 30S ribosomal protein S2                        | 0.397  | -0.321 | -0.718 | 0.274 | 0.316 | 0.019 |
| Q49X44                   | Ribosome-recycling factor                       | 0.442  | -0.283 | -0.725 | 0.082 | 0.195 | 0.001 |
| Q49XT0                   | 30S ribosomal protein S1                        | 0.550  | 1.497  | 0.948  | 0.560 | 0.038 | 0.201 |
| Q49Y85                   | 50S ribosomal protein L21                       | 0.523  | -0.217 | -0.740 | 0.224 | 0.573 | 0.042 |
| Q49YB1                   | 50S ribosomal protein L35                       | 0.261  | -1.160 | -1.420 | 0.740 | 0.038 | 0.010 |
| Q49YF2                   | 30S ribosomal protein S4                        | 0.557  | -0.273 | -0.830 | 0.059 | 0.311 | 0.002 |
| Q49YU4                   | Glutamyl-tRNA(Gln) amidotransferase subunit A   | -0.068 | -0.657 | -0.588 | 0.803 | 0.001 | 0.003 |
| Q49ZE3                   | 30S ribosomal protein S11                       | 0.388  | -0.908 | -1.296 | 0.437 | 0.021 | 0.001 |
| Q49ZE5                   | 50S ribosomal protein L36                       | 0.675  | -0.656 | -1.331 | 0.154 | 0.099 | 0.001 |
| Q49ZE9                   | 50S ribosomal protein L15                       | 0.350  | -0.403 | -0.754 | 0.236 | 0.103 | 0.003 |
| Q49ZF6                   | 50S ribosomal protein L5                        | 0.192  | -0.332 | -0.524 | 0.557 | 0.152 | 0.024 |
| Q49ZG0                   | 50S ribosomal protein L29                       | 0.393  | 0.152  | -0.241 | 0.038 | 0.385 | 0.168 |
| Q49ZG1                   | 50S ribosomal protein L16                       | 0.109  | -1.262 | -1.371 | 0.938 | 0.063 | 0.048 |

|        |                              |        |        |        |       |       |       |
|--------|------------------------------|--------|--------|--------|-------|-------|-------|
| Q49ZG2 | 30S ribosomal protein S3     | 0.045  | -0.701 | -0.746 | 0.901 | 0.001 | 0.000 |
| Q49ZG4 | 30S ribosomal protein S19    | 0.816  | -0.794 | -1.611 | 0.030 | 0.021 | 0.000 |
| Q49ZG5 | 50S ribosomal protein L2     | 0.103  | -0.555 | -0.659 | 0.760 | 0.021 | 0.005 |
| Q49ZG6 | 50S ribosomal protein L23    | 0.317  | -0.866 | -1.182 | 0.263 | 0.001 | 0.000 |
| Q49ZG7 | 50S ribosomal protein L4     | 0.184  | -0.400 | -0.583 | 0.591 | 0.116 | 0.024 |
| Q49ZG9 | 30S ribosomal protein S10    | 0.351  | -0.738 | -1.089 | 0.197 | 0.002 | 0.000 |
| Q49V57 | Elongation factor G          | 0.414  | -0.412 | -0.826 | 0.082 | 0.047 | 0.000 |
| Q49ZI5 | Uncharacterized protein      | -0.565 | 0.286  | 0.851  | 0.119 | 0.381 | 0.006 |
| Q49UQ0 | 30S ribosomal protein S6     | 0.511  | 0.219  | -0.292 | 0.245 | 0.585 | 0.507 |
| Q49V10 | 50S ribosomal protein L25    | -0.057 | -0.434 | -0.377 | 0.901 | 0.075 | 0.137 |
| Q49V39 | Cysteine--tRNA ligase        | 0.100  | -0.122 | -0.222 | 0.780 | 0.634 | 0.395 |
| Q49V47 | 50S ribosomal protein L11    | 0.455  | -0.189 | -0.644 | 0.236 | 0.585 | 0.052 |
| Q49V48 | 50S ribosomal protein L1     | 0.688  | 0.349  | -0.339 | 0.439 | 0.634 | 0.713 |
| Q49V50 | 50S ribosomal protein L7/L12 | 0.171  | 0.405  | 0.235  | 0.702 | 0.220 | 0.552 |
| Q49VF3 | Arginine--tRNA ligase        | 0.035  | -0.732 | -0.767 | 0.993 | 0.525 | 0.552 |
| Q49WC5 | Tryptophan--tRNA ligase      | -0.060 | 0.132  | 0.192  | 0.954 | 0.815 | 0.780 |
| Q49WL6 | Peptide deformylase          | 0.211  | 0.411  | 0.200  | 0.559 | 0.120 | 0.536 |
| Q49WX5 | Isoleucine--tRNA ligase      | 0.986  | 0.087  | -0.899 | 0.557 | 0.958 | 0.549 |
| Q49X05 | 50S ribosomal protein L28    | 0.284  | -0.014 | -0.298 | 0.687 | 0.981 | 0.649 |
| Q49X27 | 50S ribosomal protein L19    | 0.388  | 0.524  | 0.136  | 0.631 | 0.410 | 0.900 |
| Q49X48 | Proline--tRNA ligase         | 0.186  | 0.662  | 0.476  | 0.929 | 0.558 | 0.735 |
| Q49X61 | 30S ribosomal protein S15    | 0.141  | 0.028  | -0.113 | 0.633 | 0.920 | 0.713 |
| Q49XR0 | Asparagine--tRNA ligase      | -0.220 | -0.242 | -0.022 | 0.892 | 0.777 | 1.000 |
| Q49Y08 | Glycine--tRNA ligase         | -0.161 | -0.663 | -0.502 | 0.909 | 0.385 | 0.569 |
| Q49Y27 | 30S ribosomal protein S20    | 0.022  | -0.201 | -0.223 | 0.963 | 0.480 | 0.446 |
| Q49Y68 | Aspartate--tRNA ligase       | 0.627  | 0.821  | 0.193  | 0.287 | 0.095 | 0.775 |
| Q49Y83 | 50S ribosomal protein L27    | 0.543  | 0.218  | -0.325 | 0.116 | 0.488 | 0.300 |
| Q49YB0 | 50S ribosomal protein L20    | -0.013 | 0.325  | 0.338  | 0.999 | 0.573 | 0.613 |

|                                        |                                                            |        |        |        |       |       |       |
|----------------------------------------|------------------------------------------------------------|--------|--------|--------|-------|-------|-------|
| Q49YB4                                 | Threonine--tRNA ligase                                     | 0.288  | 0.809  | 0.520  | 0.684 | 0.107 | 0.339 |
| Q49YG2                                 | Tyrosine--tRNA ligase                                      | 0.067  | 0.703  | 0.636  | 0.958 | 0.343 | 0.405 |
| Q49YH3                                 | Phenylalanine--tRNA ligase beta subunit                    | 0.341  | 0.478  | 0.138  | 0.557 | 0.276 | 0.812 |
| Q49YU3                                 | Aspartyl/glutamyl-tRNA(Asn/Gln) amidotransferase subunit B | 0.648  | 1.548  | 0.900  | 0.560 | 0.061 | 0.315 |
| Q49YU5                                 | Aspartyl/glutamyl-tRNA(Asn/Gln) amidotransferase subunit C | -0.048 | -0.614 | -0.566 | 0.945 | 0.067 | 0.096 |
| Q49Z65                                 | Peptide chain release factor 1                             | 0.314  | 0.165  | -0.149 | 0.631 | 0.767 | 0.833 |
| Q49Z67                                 | 50S ribosomal protein L31 type B                           | 0.359  | 0.190  | -0.168 | 0.464 | 0.634 | 0.742 |
| Q49ZD5                                 | 30S ribosomal protein S9                                   | 0.366  | 0.627  | 0.261  | 0.557 | 0.159 | 0.649 |
| Q49ZD6                                 | 50S ribosomal protein L13                                  | 0.186  | -0.634 | -0.821 | 0.773 | 0.143 | 0.059 |
| Q49ZE1                                 | 50S ribosomal protein L17                                  | 0.369  | -0.243 | -0.612 | 0.416 | 0.522 | 0.079 |
| Q49ZF0                                 | 50S ribosomal protein L30                                  | 0.578  | 0.172  | -0.405 | 0.081 | 0.573 | 0.169 |
| Q49ZF1                                 | 30S ribosomal protein S5                                   | 0.174  | -0.231 | -0.405 | 0.760 | 0.581 | 0.334 |
| Q49ZF2                                 | 50S ribosomal protein L18                                  | -0.168 | 0.706  | 0.874  | 0.902 | 0.364 | 0.262 |
| Q49ZF3                                 | 50S ribosomal protein L6                                   | 0.374  | -0.149 | -0.523 | 0.236 | 0.604 | 0.054 |
| Q49ZF4                                 | 30S ribosomal protein S8                                   | 0.416  | 0.192  | -0.225 | 0.537 | 0.727 | 0.735 |
| Q49ZF7                                 | 50S ribosomal protein L24                                  | 0.213  | 0.297  | 0.084  | 0.703 | 0.500 | 0.906 |
| Q49ZF8                                 | 50S ribosomal protein L14                                  | 0.547  | -0.048 | -0.595 | 0.233 | 0.920 | 0.134 |
| Q49ZF9                                 | 30S ribosomal protein S17                                  | 0.318  | -0.048 | -0.367 | 0.439 | 0.900 | 0.268 |
| Q49ZG3                                 | 50S ribosomal protein L22                                  | 0.657  | 0.037  | -0.621 | 0.215 | 0.948 | 0.174 |
| Q49ZG8                                 | 50S ribosomal protein L3                                   | 0.882  | 1.129  | 0.247  | 0.241 | 0.075 | 0.775 |
| Q4A166                                 | 50S ribosomal protein L9                                   | 0.305  | -0.067 | -0.372 | 0.416 | 0.834 | 0.219 |
| Q4A172                                 | Serine--tRNA ligase                                        | -1.280 | 0.035  | 1.315  | 0.123 | 0.966 | 0.061 |
| Q49V58                                 | Elongation factor Tu                                       | 0.018  | 0.251  | 0.233  | 0.969 | 0.343 | 0.391 |
| Q49X42                                 | Elongation factor Ts                                       | 0.318  | 0.182  | -0.136 | 0.269 | 0.482 | 0.664 |
| Q49XX3                                 | Elongation factor P                                        | 0.101  | -0.238 | -0.339 | 0.901 | 0.604 | 0.505 |
| <b>Protein Folding and degradation</b> |                                                            |        |        |        |       |       |       |
| Q49Y22                                 | Chaperone protein DnaK                                     | 0.407  | -0.300 | -0.707 | 0.060 | 0.107 | 0.000 |

|                                                             |                                                               |        |        |        |       |       |       |
|-------------------------------------------------------------|---------------------------------------------------------------|--------|--------|--------|-------|-------|-------|
| Q49Y23                                                      | Protein GrpE                                                  | 0.476  | 0.063  | -0.413 | 0.015 | 0.752 | 0.020 |
| Q49YY6                                                      | 10 kDa chaperonin                                             | -0.195 | 1.099  | 1.294  | 0.601 | 0.000 | 0.000 |
| Q49WT1                                                      | Uncharacterized protein SSP1625                               | -0.216 | -2.604 | -2.387 | 0.467 | 0.000 | 0.000 |
| Q49VZ2                                                      | ATP-dependent Clp protease proteolytic subunit                | 0.035  | 0.641  | 0.606  | 0.963 | 0.135 | 0.174 |
| Q49YS4                                                      | Leucyl aminopeptidase                                         | 0.527  | 0.453  | -0.073 | 0.559 | 0.529 | 0.965 |
| Q49W93                                                      | Putative peptidyl-prolyl cis-trans isomerase                  | 0.843  | 0.743  | -0.099 | 0.117 | 0.099 | 0.900 |
| Q49YA6                                                      | ATP-dependent Clp protease ATP-binding subunit ClpX           | -0.278 | 0.657  | 0.934  | 0.796 | 0.391 | 0.225 |
| Q49YA7                                                      | Trigger factor                                                | 0.081  | -0.218 | -0.300 | 0.796 | 0.345 | 0.187 |
| Q49YY5                                                      | 60 kDa chaperonin                                             | 0.150  | 0.358  | 0.209  | 0.602 | 0.101 | 0.390 |
| <b>'de novo' Pyrimidine nucleobase biosynthetic process</b> |                                                               |        |        |        |       |       |       |
| Q49VB7                                                      | 3-hexulose-6-phosphate synthase 3                             | -0.303 | -0.952 | -0.648 | 0.560 | 0.021 | 0.104 |
| Q49WT0                                                      | 3-hexulose-6-phosphate synthase 2                             | -0.833 | -0.086 | 0.747  | 0.005 | 0.777 | 0.006 |
| Q49X43                                                      | Uridylate kinase                                              | 0.072  | 0.625  | 0.553  | 0.901 | 0.034 | 0.055 |
| Q49XT1                                                      | Cytidylate kinase                                             | 0.419  | 0.365  | -0.054 | 0.284 | 0.287 | 0.922 |
| Q49Y11                                                      | Cytidine deaminase                                            | -0.406 | -0.462 | -0.055 | 0.274 | 0.136 | 0.912 |
| Q49Z59                                                      | Uracil phosphoribosyltransferase                              | -0.457 | 0.084  | 0.542  | 0.378 | 0.849 | 0.201 |
| Q49Z73                                                      | CTP synthase                                                  | 0.987  | -0.110 | -1.097 | 0.426 | 0.925 | 0.271 |
| <b>"de novo" purine metabolism</b>                          |                                                               |        |        |        |       |       |       |
| Q49WI9                                                      | N5-carboxyaminoimidazole ribonucleotide synthase PurK         | 2.377  | 2.377  | 0.000  | 0.000 | 0.000 | 1.000 |
| Q49WJ0                                                      | Phosphoribosylaminoimidazole-succinocarboxamide synthase PurC | 2.184  | 2.184  | 0.000  | 0.000 | 0.000 | 1.000 |
| Q49WJ1                                                      | Phosphoribosylformylglycinamide synthase subunit PurS         | 1.035  | 1.035  | 0.000  | 0.000 | 0.000 | 1.000 |
| Q49WJ2                                                      | Phosphoribosylformylglycinamide synthase subunit PurQ         | 1.006  | 1.006  | 0.000  | 0.011 | 0.007 | 1.000 |
| Q49WJ3                                                      | Phosphoribosylformylglycinamide synthase subunit PurL         | 3.345  | 3.345  | 0.000  | 0.000 | 0.000 | 1.000 |
| Q49WJ5                                                      | Phosphoribosylformylglycinamide cyclo-ligase PurM             | 2.365  | 2.365  | 0.000  | 0.000 | 0.000 | 1.000 |
| Q49WJ7                                                      | Bifunctional purine biosynthesis protein PurH                 | 4.249  | 4.249  | 0.000  | 0.000 | 0.000 | 1.000 |
| Q49WJ8                                                      | Phosphoribosylamine--glycine ligase PurD                      | 3.038  | 3.038  | 0.000  | 0.000 | 0.000 | 1.000 |
| Q49UU8                                                      | Inosine-5'-monophosphate dehydrogenase                        | 0.129  | 0.487  | 0.358  | 0.910 | 0.450 | 1.000 |

|                              |                                                                                |        |        |        |       |       |       |
|------------------------------|--------------------------------------------------------------------------------|--------|--------|--------|-------|-------|-------|
| Q49UU9                       | GMP synthase [glutamine-hydrolyzing]                                           | 0.780  | -0.541 | -1.321 | 0.458 | 0.529 | 0.104 |
| Q49V19                       | Putative hypoxanthine-guanine phosphoribosyltransferase                        | 0.109  | -0.330 | -0.439 | 0.892 | 0.452 | 0.322 |
| Q49XU7                       | Putative ADP-ribose pyrophosphatase                                            | -0.068 | 0.093  | 0.160  | 0.892 | 0.746 | 0.619 |
| Q49V09                       | Ribose-phosphate pyrophosphokinase                                             | -0.532 | -0.167 | 0.365  | 0.591 | 0.838 | 0.717 |
| Q49XS3                       | Nucleoside diphosphate kinase                                                  | 0.225  | 0.304  | 0.079  | 0.326 | 0.099 | 0.753 |
| Q49WI8                       | N5-carboxyaminoimidazole ribonucleotide mutase                                 | -0.068 | -0.068 | 0.000  | 0.740 | 0.659 | 1.000 |
| <b>Glycolysis</b>            |                                                                                |        |        |        |       |       |       |
| Q49WL8                       | Pyruvate dehydrogenase E1 component alpha subunit                              | -0.043 | -0.662 | -0.620 | 0.922 | 0.005 | 0.006 |
| Q49VZ9                       | Glyceraldehyde-3-phosphate dehydrogenase                                       | 0.319  | -0.257 | -0.575 | 0.218 | 0.243 | 0.008 |
| Q49W00                       | Phosphoglycerate kinase                                                        | 0.128  | -0.622 | -0.750 | 0.602 | 0.002 | 0.000 |
| Q49W01                       | Triosephosphate isomerase                                                      | 0.431  | -0.399 | -0.830 | 0.068 | 0.053 | 0.000 |
| Q49W02                       | 2_3-bisphosphoglycerate-independent phosphoglycerate mutase                    | 0.330  | -0.386 | -0.716 | 0.224 | 0.086 | 0.002 |
| Q49YC7                       | Pyruvate kinase                                                                | 0.142  | -0.373 | -0.515 | 0.591 | 0.061 | 0.010 |
| Q49ZZ2                       | 2_3-bisphosphoglycerate-dependent phosphoglycerate mutase                      | 0.268  | 1.226  | 0.958  | 0.631 | 0.006 | 0.024 |
| Q49W03                       | Enolase                                                                        | 0.183  | 0.014  | -0.168 | 0.557 | 0.961 | 0.527 |
| Q49WA1                       | Glucose-6-phosphate isomerase                                                  | 0.444  | 0.642  | 0.198  | 0.581 | 0.311 | 0.811 |
| Q49WL9                       | Pyruvate dehydrogenase E1 component beta subunit                               | -0.116 | -0.360 | -0.245 | 0.687 | 0.079 | 0.264 |
| Q49WM0                       | Dihydrolipoamide acetyltransferase component of pyruvate dehydrogenase complex | 0.227  | 1.206  | 0.980  | 0.840 | 0.077 | 0.169 |
| Q49Z72                       | Fructose-bisphosphate aldolase                                                 | 0.045  | -0.127 | -0.172 | 0.916 | 0.585 | 0.506 |
| Q4A0Q6                       | Fructose-bisphosphate aldolase class I                                         | 0.553  | -0.042 | -0.596 | 0.128 | 0.917 | 0.058 |
| <b>Lactose metabolism</b>    |                                                                                |        |        |        |       |       |       |
| Q49VP7                       | Tagatose-6-phosphate kinase                                                    | 1.526  | 0.952  | -0.574 | 0.005 | 0.051 | 0.264 |
| <b>Lactic fermentation</b>   |                                                                                |        |        |        |       |       |       |
| Q49YJ3                       | L-lactate dehydrogenase                                                        | 1.148  | 0.293  | -0.855 | 0.195 | 0.727 | 0.271 |
| <b>One carbon metabolism</b> |                                                                                |        |        |        |       |       |       |
| Q49WI7                       | Bifunctional protein FolD                                                      | 2.914  | 2.839  | -0.075 | 0.000 | 0.000 | 0.834 |
| Q49Z60                       | Serine hydroxymethyltransferase                                                | 0.624  | 0.214  | -0.410 | 0.012 | 0.364 | 0.063 |

|                                                                            |                                                        |        |        |        |       |       |       |
|----------------------------------------------------------------------------|--------------------------------------------------------|--------|--------|--------|-------|-------|-------|
| <b>Phosphoenolpyruvate-dependent sugar phosphotransferase system (PTS)</b> |                                                        |        |        |        |       |       |       |
| Q49WK7                                                                     | Phosphoenolpyruvate-protein phosphotransferase         | 0.321  | -0.553 | -0.874 | 0.236 | 0.021 | 0.000 |
| Q49ZA5                                                                     | Phosphotransferase system mannitol-specific IIA domain | -0.526 | -0.526 | 0.001  | 0.053 | 0.033 | 1.000 |
| <b>Glycerol Metabolic Process</b>                                          |                                                        |        |        |        |       |       |       |
| Q49X93                                                                     | Glycerol kinase                                        | 0.699  | -0.468 | -1.167 | 0.197 | 0.333 | 0.011 |
| <b>Pentose Phosphate Pathway</b>                                           |                                                        |        |        |        |       |       |       |
| Q49XD6                                                                     | Transketolase                                          | 0.221  | -0.478 | -0.699 | 0.439 | 0.034 | 0.002 |
| Q49XV6                                                                     | 6-phosphogluconate dehydrogenase_ decarboxylating      | 0.099  | -0.402 | -0.501 | 0.741 | 0.057 | 0.018 |
| Q49XV2                                                                     | Glucose-6-phosphate 1-dehydrogenase                    | 0.298  | 0.437  | 0.139  | 0.773 | 0.563 | 0.907 |
| Q49YL0                                                                     | Transaldolase                                          | -0.011 | -0.346 | -0.335 | 0.986 | 0.085 | 0.104 |
| Q49Z84                                                                     | Deoxyribose-phosphate aldolase                         | 0.173  | 0.196  | 0.023  | 0.898 | 0.790 | 1.000 |
| <b>Carbohydrate Metabolic process</b>                                      |                                                        |        |        |        |       |       |       |
| Q49ZA7                                                                     | Phosphoglucosamine mutase                              | 0.869  | 1.566  | 0.697  | 0.378 | 0.044 | 0.407 |
| Q49Z82                                                                     | Phosphopentomutase                                     | -1.769 | -1.167 | 0.603  | 0.011 | 0.061 | 0.377 |
| Q49Z69                                                                     | Putative aldehyde dehydrogenase SSP0762                | -0.226 | -1.596 | -1.370 | 0.786 | 0.007 | 0.016 |
| Q4A113                                                                     | Putative UDP-glucose 6-dehydrogenase                   | 0.569  | 0.569  | 0.000  | 0.113 | 0.061 | 1.000 |
| Q4A122                                                                     | UTP--glucose-1-phosphate uridylyltransferase 1         | -0.016 | -0.016 | 0.000  | 0.954 | 0.919 | 1.000 |
| <b>Fatty acid metabolism</b>                                               |                                                        |        |        |        |       |       |       |
| Q49WB7                                                                     | 3-oxoacyl-[acyl-carrier-protein] synthase 2            | 0.130  | -0.495 | -0.625 | 0.696 | 0.044 | 0.011 |
| Q49X16                                                                     | Acyl carrier protein                                   | 0.644  | -0.055 | -0.699 | 0.057 | 0.867 | 0.018 |
| Q4A0D5                                                                     | Acetyl-CoA acetyltransferase                           | -0.214 | -1.708 | -1.495 | 0.782 | 0.002 | 0.005 |
| Q49WM1                                                                     | Dihydrolipoyl dehydrogenase                            | 0.174  | -0.394 | -0.568 | 0.557 | 0.068 | 0.010 |
| Q49UH6                                                                     | Putative acyl-CoA hydrolase                            | 0.376  | 0.165  | -0.211 | 0.456 | 0.704 | 0.678 |
| Q49VJ6                                                                     | Putative dihydroxyacetone kinase                       | 0.324  | 0.171  | -0.153 | 0.279 | 0.529 | 0.640 |
| Q49WB6                                                                     | 3-oxoacyl-[acyl-carrier-protein] synthase 3            | 0.151  | -0.680 | -0.831 | 0.901 | 0.311 | 0.215 |
| Q49WE0                                                                     | Enoyl-[acyl-carrier-protein] reductase [NADPH]         | -0.290 | -0.232 | 0.058  | 0.631 | 0.634 | 0.952 |
| Q49X15                                                                     | 3-oxoacyl-[acyl-carrier protein] reductase             | 0.380  | 0.279  | -0.101 | 0.594 | 0.633 | 0.911 |

|                                           |                                                                                                   |        |        |        |       |       |       |
|-------------------------------------------|---------------------------------------------------------------------------------------------------|--------|--------|--------|-------|-------|-------|
| Q49YC9                                    | Acetyl-coenzyme A carboxylase carboxyl transferase subunit alpha                                  | -0.070 | 0.000  | 0.070  | 0.782 | 1.000 | 0.764 |
| Q49YE2                                    | Acetate kinase                                                                                    | 0.804  | 0.517  | -0.287 | 0.462 | 0.572 | 0.801 |
| <b>Tricarboxylic Acid Cycle</b>           |                                                                                                   |        |        |        |       |       |       |
| Q49XE4                                    | Aconitate hydratase                                                                               | -1.895 | 2.000  | 3.900  | 0.096 | 0.044 | 0.000 |
| Q49XM4                                    | Dihydrolipoyllysine-residue succinyltransferase component of 2-oxoglutarate dehydrogenase complex | 0.607  | 1.615  | 1.010  | 0.462 | 0.014 | 0.117 |
| Q49YC4                                    | Isocitrate dehydrogenase [NADP]                                                                   | -0.251 | 2.022  | 2.270  | 0.786 | 0.002 | 0.001 |
| Q49X32                                    | Succinate--CoA ligase [ADP-forming] subunit beta                                                  | 0.962  | 1.164  | 0.202  | 0.233 | 0.084 | 0.834 |
| Q49X33                                    | Succinate--CoA ligase [ADP-forming] subunit alpha                                                 | 0.959  | 0.617  | -0.343 | 0.127 | 0.262 | 0.612 |
| Q49YC5                                    | Citrate synthase                                                                                  | 0.237  | 0.147  | -0.090 | 0.714 | 0.777 | 0.909 |
| Q4A102                                    | Probable malate:quinone oxidoreductase                                                            | 0.370  | -0.076 | -0.446 | 0.776 | 0.948 | 0.707 |
| <b>ATP synthesis</b>                      |                                                                                                   |        |        |        |       |       |       |
| Q49Z50                                    | ATP synthase subunit beta                                                                         | -0.061 | -0.378 | -0.317 | 0.796 | 0.026 | 0.056 |
| Q49W80                                    | NADH dehydrogenase-like protein SSP1834                                                           | 0.606  | 2.729  | 2.123  | 0.467 | 0.000 | 0.002 |
| Q49YW3                                    | Probable manganese-dependent inorganic pyrophosphatase                                            | 0.372  | -0.059 | -0.431 | 0.175 | 0.815 | 0.060 |
| Q49Z51                                    | ATP synthase gamma chain                                                                          | -0.190 | 0.105  | 0.295  | 0.594 | 0.727 | 0.314 |
| Q49Z52                                    | ATP synthase subunit alpha                                                                        | -0.186 | -0.418 | -0.232 | 0.557 | 0.061 | 0.335 |
| <b>Vitamins and cofactors</b>             |                                                                                                   |        |        |        |       |       |       |
| Q49VD0                                    | Putative phosphomethylpyrimidine kinase                                                           | -0.423 | -0.282 | 0.141  | 0.389 | 0.497 | 0.787 |
| Q49XG3                                    | Probable tautomerase SSP1389                                                                      | -0.209 | 0.004  | 0.213  | 0.560 | 0.992 | 0.506 |
| Q49Y99                                    | Glutamate-1-semialdehyde 2_1-aminomutase 2                                                        | 0.101  | 0.300  | 0.198  | 0.929 | 0.633 | 0.801 |
| Q49YA0                                    | Delta-aminolevulinic acid dehydratase                                                             | 0.084  | 0.084  | 0.000  | 0.570 | 0.482 | 1.000 |
| Q49YJ6                                    | 6_7-dimethyl-8-ribityllumazine synthase                                                           | 0.602  | -0.156 | -0.758 | 0.209 | 0.727 | 0.058 |
| <b>Cell wall synthesis and remodeling</b> |                                                                                                   |        |        |        |       |       |       |
| Q49W64                                    | Lipoyl synthase                                                                                   | 0.223  | 0.851  | 0.628  | 0.602 | 0.013 | 0.058 |
| Q49W71                                    | D-alanine--poly(phosphoribitol) ligase subunit 1                                                  | -1.709 | 1.228  | 2.937  | 0.008 | 0.038 | 0.000 |
| Q49W73                                    | D-alanine--poly(phosphoribitol) ligase subunit 2                                                  | -1.327 | -0.597 | 0.730  | 0.013 | 0.220 | 0.141 |



|                            |                                                                    |        |        |        |       |       |       |
|----------------------------|--------------------------------------------------------------------|--------|--------|--------|-------|-------|-------|
| Q4A0G5                     | Probable transglycosylase IsaA                                     | 2.075  | 0.681  | -1.394 | 0.016 | 0.403 | 0.075 |
| Q49VI7                     | Teichoic acid biosynthesis protein                                 | -0.020 | 0.056  | 0.076  | 0.954 | 0.777 | 0.753 |
| Q4A0A8                     | Ribitol-5-phosphate cytidyltransferase                             | 0.543  | 0.584  | 0.041  | 0.128 | 0.059 | 0.949 |
| Q49Z31                     | D-alanine--D-alanine ligase                                        | 0.407  | 0.498  | 0.091  | 0.557 | 0.356 | 0.912 |
| <b>DNA Binding Protein</b> |                                                                    |        |        |        |       |       |       |
| Q49YP0                     | Uncharacterized protein                                            | 0.103  | -0.767 | -0.870 | 0.892 | 0.049 | 0.024 |
| <b>DNA repair</b>          |                                                                    |        |        |        |       |       |       |
| Q49Y00                     | Probable endonuclease 4                                            | 0.408  | 0.404  | -0.004 | 0.263 | 0.183 | 1.000 |
| <b>Cell division</b>       |                                                                    |        |        |        |       |       |       |
| Q49WW8                     | Cell division protein FtsZ                                         | -0.312 | 0.224  | 0.536  | 0.705 | 0.655 | 0.339 |
| Q49WX4                     | Putative cell-division initiation protein                          | 0.387  | 0.161  | -0.226 | 0.727 | 0.464 | 0.678 |
| Q49XS7                     | Bacterial nucleoid DNA-binding protein HU                          | -0.280 | -0.385 | -0.104 | 0.458 | 0.181 | 0.790 |
| Q49ZB1                     | Iron-sulfur cluster carrier protein                                | 0.002  | 0.157  | 0.156  | 1.000 | 0.522 | 0.569 |
| <b>Cell signaling</b>      |                                                                    |        |        |        |       |       |       |
| Q49ZE7                     | Adenylate kinase                                                   | 0.318  | -0.435 | -0.753 | 0.195 | 0.038 | 0.001 |
| Q49YM8                     | Signal transduction protein                                        | 0.666  | 0.791  | 0.124  | 0.037 | 0.007 | 0.743 |
| <b>Transport</b>           |                                                                    |        |        |        |       |       |       |
| Q49WK6                     | Phosphocarrier protein HPr                                         | -0.079 | 0.278  | 0.357  | 0.892 | 0.364 | 0.245 |
| Q49XN3                     | PTS system glucose-specific IIA component                          | 0.000  | -0.120 | -0.119 | 1.000 | 0.683 | 0.739 |
| Q49XJ3                     | ATPase component of ABC transporter with duplicated ATPase domains | 1.377  | 0.995  | -0.382 | 0.051 | 0.100 | 0.622 |
| <b>Oxidative stress</b>    |                                                                    |        |        |        |       |       |       |
| Q49UT8                     | Alkyl hydroperoxide reductase subunit C                            | 0.490  | -0.408 | -0.899 | 0.026 | 0.040 | 0.000 |
| Q49UU5                     | Nitronate monooxygenase                                            | -0.339 | 1.063  | 1.402  | 0.402 | 0.001 | 0.000 |
| Q49W43                     | Putative thioredoxin                                               | 0.176  | 0.574  | 0.398  | 0.644 | 0.047 | 0.182 |
| Q49WR2                     | Thioredoxin                                                        | 0.494  | -0.133 | -0.627 | 0.011 | 0.480 | 0.001 |

|                                |                                                                                                    |  |        |        |        |       |       |       |
|--------------------------------|----------------------------------------------------------------------------------------------------|--|--------|--------|--------|-------|-------|-------|
| Q49XC1                         | Catalase                                                                                           |  | 3.691  | 3.811  | 0.120  | 0.000 | 0.000 | 0.735 |
| Q49XN4                         | Peptide methionine sulfoxide reductase MsrB                                                        |  | 0.228  | 0.460  | 0.232  | 0.449 | 0.044 | 0.339 |
| Q49XZ6                         | Superoxide dismutase [Mn/Fe]                                                                       |  | 0.338  | -0.406 | -0.744 | 0.128 | 0.038 | 0.000 |
| Q49YE0                         | Putative universal stress protein SSP1056                                                          |  | 2.055  | 2.055  | 0.000  | 0.000 | 0.000 | 1.000 |
| Q49YE4                         | Probable thiol peroxidase                                                                          |  | 0.280  | -0.419 | -0.699 | 0.376 | 0.085 | 0.005 |
| Q4A052                         | Putative glyoxalase family protein                                                                 |  | -0.077 | -0.375 | -0.298 | 0.922 | 0.367 | 0.530 |
| Q4A054                         | Putative glyoxalase family protein                                                                 |  | -0.105 | -0.302 | -0.198 | 0.853 | 0.385 | 0.647 |
| <b>Iron metabolism</b>         |                                                                                                    |  |        |        |        |       |       |       |
| Q49UL6                         | Flavoheomprotein                                                                                   |  | 0.628  | 1.161  | 0.533  | 0.222 | 0.009 | 0.239 |
| Q49WI6                         | Putative flavoheomprotein                                                                          |  | 1.422  | -0.549 | -1.971 | 0.130 | 0.529 | 0.016 |
| Q49YT7                         | Bacterial non-heme ferritin                                                                        |  | 0.428  | -0.657 | -1.085 | 0.496 | 0.168 | 0.024 |
| Q49ZK8                         | Putative ABC-type cobalamin Fe <sup>3+</sup> --siderophores transport system periplasmic component |  | 1.052  | -1.038 | -2.090 | 0.233 | 0.161 | 0.006 |
| Q49VE0                         | Putative heme-dependent peroxidase SSP2125                                                         |  | 1.522  | 1.043  | -0.479 | 0.003 | 0.026 | 0.331 |
| Q49VT4                         | Putative ABC-type cobalamin Fe <sup>3+</sup> --siderophores transport system periplasmic component |  | 0.591  | 0.300  | -0.292 | 0.557 | 0.717 | 0.769 |
| Q49YM6                         | Ferrochelatae                                                                                      |  | 0.406  | 0.174  | -0.232 | 0.321 | 0.633 | 0.567 |
| <b>Nitrogen metabolism</b>     |                                                                                                    |  |        |        |        |       |       |       |
| Q4A0J5                         | Urease subunit alpha                                                                               |  | -1.782 | 1.338  | 3.120  | 0.034 | 0.068 | 0.000 |
| Q4A0J8                         | Urease accessory protein UreG                                                                      |  | -0.416 | 0.936  | 1.352  | 0.464 | 0.038 | 0.003 |
| <b>Stress response</b>         |                                                                                                    |  |        |        |        |       |       |       |
| Q49V34                         | ATP-dependent Clp protease ATP-binding subunit ClpC                                                |  | 0.285  | 0.378  | 0.093  | 0.760 | 0.583 | 0.939 |
| Q49W40                         | Organic hydroperoxide resistance protein-like 1                                                    |  | 0.000  | -0.148 | -0.148 | 1.000 | 0.319 | 0.334 |
| Q49YD5                         | Putative universal stress protein                                                                  |  | -0.730 | -0.638 | 0.092  | 0.186 | 0.166 | 0.907 |
| Q49YH5                         | Putative thioredoxin                                                                               |  | -0.033 | -0.124 | -0.092 | 0.958 | 0.743 | 0.860 |
| Q49YY9                         | Nitroreductase family protein                                                                      |  | 0.112  | 0.153  | 0.040  | 0.602 | 0.381 | 0.885 |
| Q49ZC7                         | Alkaline shock protein 23                                                                          |  | 0.000  | -0.346 | -0.346 | 1.000 | 0.183 | 0.206 |
| Q49ZX5                         | Putative small heat shock protein                                                                  |  | 0.175  | 0.017  | -0.158 | 0.646 | 0.963 | 0.678 |
| <b>Uncharacterized Protein</b> |                                                                                                    |  |        |        |        |       |       |       |

|        |                                                    |        |        |        |       |       |       |
|--------|----------------------------------------------------|--------|--------|--------|-------|-------|-------|
| Q49Y55 | UPF0297 protein SSP1144                            | -0.526 | -0.583 | -0.058 | 0.088 | 0.034 | 0.900 |
| Q49YH0 | UPF0478 protein SSP1024                            | -0.434 | 0.271  | 0.706  | 0.197 | 0.364 | 0.014 |
| Q49YS0 | Uncharacterized protein SSP0918                    | 0.000  | -0.327 | -0.327 | 1.000 | 0.044 | 0.045 |
| Q49ZY4 | Uncharacterized protein                            | -0.128 | -0.408 | -0.280 | 0.602 | 0.037 | 0.152 |
| Q49WA8 | Uncharacterized protein SSP1806                    | 0.350  | -0.646 | -0.996 | 0.557 | 0.135 | 0.023 |
| Q49XB9 | Uncharacterized protein                            | 0.261  | -0.769 | -1.030 | 0.591 | 0.038 | 0.006 |
| Q49W20 | Putative lysophospholipase                         | -0.567 | -0.681 | -0.114 | 0.128 | 0.038 | 0.794 |
| Q4A0W6 | UPF0176 protein SSP0127                            | 0.731  | 0.731  | 0.000  | 0.012 | 0.007 | 1.000 |
| Q49V17 | Putative RNA binding protein                       | 0.201  | 0.070  | -0.131 | 0.559 | 0.801 | 0.700 |
| Q49VE1 | Phosphotransacetylase                              | 0.377  | -0.247 | -0.624 | 0.342 | 0.480 | 0.054 |
| Q49VG6 | Uncharacterized protein                            | 0.164  | -0.345 | -0.510 | 0.689 | 0.261 | 0.090 |
| Q49VT0 | Ribonucleoside-diphosphate reductase minor subunit | 0.529  | 0.731  | 0.202  | 0.455 | 0.169 | 0.780 |
| Q49VV4 | Uncharacterized protein SSP1961                    | -0.529 | 0.000  | 0.529  | 0.119 | 1.000 | 0.066 |
| Q49W17 | UPF0337 protein SSP1897                            | -0.067 | -0.465 | -0.398 | 0.958 | 0.529 | 0.659 |
| Q49W44 | Uncharacterized protein                            | -0.088 | 0.344  | 0.432  | 0.922 | 0.480 | 0.377 |
| Q49W54 | Uncharacterized protein                            | 0.494  | 0.598  | 0.104  | 0.570 | 0.385 | 0.926 |
| Q49WE4 | Putative phosphoesterase SSP1770                   | 0.525  | 0.429  | -0.096 | 0.402 | 0.398 | 0.907 |
| Q49WH5 | Uncharacterized protein                            | 0.167  | 0.041  | -0.126 | 0.572 | 0.867 | 0.664 |
| Q49WL4 | UPF0356 protein SSP1700                            | -0.787 | 0.218  | 1.005  | 0.378 | 0.777 | 0.169 |
| Q49X06 | Uncharacterized protein                            | 0.260  | 0.421  | 0.161  | 0.692 | 0.403 | 0.806 |
| Q49X75 | Uncharacterized protein                            | 0.000  | 0.308  | 0.308  | 1.000 | 0.070 | 0.072 |
| Q49XA3 | Uncharacterized protein                            | 0.208  | -0.470 | -0.678 | 0.692 | 0.229 | 0.078 |
| Q49XP1 | Uncharacterized protein                            | 0.040  | -0.537 | -0.577 | 0.958 | 0.168 | 0.154 |
| Q49XV9 | UPF0403 protein SSP1241                            | -0.061 | -0.450 | -0.388 | 0.922 | 0.161 | 0.254 |
| Q49XY9 | Uncharacterized protein                            | 0.314  | 0.005  | -0.308 | 0.165 | 0.981 | 0.111 |
| Q49Y63 | UPF0337 protein SSP1134                            | -0.080 | -0.607 | -0.527 | 0.963 | 0.573 | 0.690 |
| Q49YI7 | Uncharacterized protein                            | 0.305  | 0.101  | -0.205 | 0.456 | 0.777 | 0.595 |
| Q49YN8 | UPF0342 protein SSP0954                            | 0.488  | 0.364  | -0.124 | 0.471 | 0.528 | 0.894 |
| Q49YQ1 | Uncharacterized protein                            | 0.248  | 0.133  | -0.115 | 0.699 | 0.797 | 0.885 |

|        |                                              |        |        |        |       |       |       |
|--------|----------------------------------------------|--------|--------|--------|-------|-------|-------|
| Q49YS1 | Uncharacterized protein                      | -0.233 | -0.741 | -0.508 | 0.731 | 0.116 | 0.328 |
| Q49YS5 | UPF0435 protein SSP0913                      | -0.038 | -0.364 | -0.326 | 0.954 | 0.302 | 0.375 |
| Q49Z85 | Purine nucleoside phosphorylase DeoD-type    | 0.291  | 0.021  | -0.271 | 0.581 | 0.966 | 0.569 |
| Q49Z99 | Putative hydrolase                           | -0.281 | 0.146  | 0.426  | 0.464 | 0.648 | 0.169 |
| Q49ZB5 | Probable uridylyltransferase SSP0716         | 0.294  | 0.630  | 0.336  | 0.780 | 0.398 | 0.733 |
| Q49ZM5 | Putative 2-hydroxyacid dehydrogenase SSP0606 | -0.017 | -0.415 | -0.398 | 0.992 | 0.356 | 0.390 |
| Q49ZQ3 | Putative short chain dehydrogenase           | 0.000  | 0.027  | 0.027  | 1.000 | 0.848 | 0.900 |
| Q4A0P1 | Putative nitroreductase                      | 0.168  | 0.258  | 0.090  | 0.560 | 0.242 | 0.759 |
| Q4A0Y2 | Uncharacterized protein                      | -0.041 | -0.777 | -0.735 | 0.992 | 0.482 | 0.552 |

<sup>1</sup> Accession number provided by Uniprot Database (<http://www.uniprot.org/>).

<sup>2</sup> Obtained from limma's topTable by subtracting the average expression in log2 scale against the strains.

<sup>3</sup> p-value from the Student's t distribution. Proteins with p-value  $\leq 0.05$  were considered regulated among the strains.
